# Supplementary material for: Health Resources Allocation Analyzing of the Western China
Source: Research Square preprint supplement (doi:10.21203/rs.3.rs-122801/v1), 2020-12-15
Supplement: Supplementary file 1 [file 88ac970eca7f8307e03b1350.docx]

| **Table 3 Distribution of health technicians per 1,000**  **population in western China from 2014 to 2018** | | | | | | | | | | |
| --- | --- | --- | --- | --- | --- | --- | --- | --- | --- | --- |
| **region** | 2014 | | 2015 | | 2016 | | 2017 | | 2018 | |
| physician | nurse | physician | nurse | physician | nurse | physician | nurse | physician | nurse |
| **Guangxi** | 1.82 | 2.19 | 1.90 | 2.40 | 2.00 | 2.53 | 2.07 | 2.70 | 2.15 | 2.85 |
| **Shaanxi** | 2.03 | 2.58 | 2.10 | 2.80 | 2.25 | 3.06 | 2.43 | 3.31 | 2.56 | 3.57 |
| **Gansu** | 1.84 | 1.75 | 1.90 | 1.80 | 2.02 | 1.94 | 2.14 | 2.23 | 2.26 | 2.44 |
| **Qinghai** | 2.22 | 2.19 | 2.30 | 2.20 | 2.30 | 2.42 | 2.59 | 2.76 | 2.68 | 2.91 |
| **Ningxia** | 2.27 | 2.28 | 2.40 | 2.40 | 2.53 | 2.68 | 2.67 | 3.16 | 2.82 | 3.38 |
| **Xinjiang** | 2.38 | 2.60 | 2.40 | 2.70 | 2.51 | 2.82 | 2.55 | 2.89 | 2.55 | 2.91 |
| **Sichuan** | 2.21 | 2.16 | 2.20 | 2.30 | 2.24 | 2.51 | 2.35 | 2.75 | 2.46 | 2.96 |
| **Chongqing** | 1.94 | 1.32 | 2.00 | 2.30 | 2.12 | 2.54 | 2.23 | 2.76 | 2.46 | 3.07 |
| **Yunnan** | 1.60 | 1.23 | 1.70 | 2.00 | 1.80 | 2.22 | 1.96 | 2.68 | 2.06 | 2.83 |
| **Guizhou** | 1.65 | 1.92 | 1.80 | 2.20 | 1.94 | 2.42 | 2.11 | 2.74 | 2.26 | 3.03 |
| **[Inner](https://d.docs.live.net/922c5db5e5f1f57b/博士资料/王政论文/javascript:;) [Mongolia](https://d.docs.live.net/922c5db5e5f1f57b/博士资料/王政论文/javascript:;)** | 2.48 | 2.26 | 2.60 | 1.90 | 2.63 | 2.64 | 2.78 | 2.84 | 2.90 | 3.02 |
| **Tibet** | 1.76 | 1.43 | 1.90 | 1.00 | 1.98 | 1.16 | 2.26 | 1.32 | 2.42 | 1.62 |
